# Supplementary material for: Effects of Non-Invasive Radiofrequency Diathermy in Pelvic Floor Disorders: A Systematic Review
Source: MDPI journal article supplement (doi:10.3390/medicina58030437), 2022-03-17
Supplement: s1 [file s1]

## SUPPLEMENTARY TABLES

**Supplementary Table S1. PEDro Assessment Scores.**

| Items                    | 2   | 3   | 4   | 5   | 6  | 7   | 8   | 9   | 10  | 11 | TOTAL |
|--------------------------|-----|-----|-----|-----|----|-----|-----|-----|-----|----|-------|
| <b>Authorship</b>        |     |     |     |     |    |     |     |     |     |    |       |
| Bretelle et al., 2020    | Yes | No  | No  | Yes | No | Yes | No  | Yes | Yes | No | 5     |
| Krychman et al., 2017    | Yes | Yes | No  | Yes | No | No  | Yes | Yes | Yes | No | 6     |
| Pavone et al., 2017      | Yes | Yes | Yes | Yes | No | No  | Yes | No  | No  | No | 5     |
| Lordelo et al., 2016     | Yes | Yes | Yes | Yes | No | Yes | No  | Yes | Yes | No | 7     |
| Leibaschoff et al., 2016 | Yes | No  | Yes | Yes | No | No  | Yes | No  | Yes | No | 5     |

Abbreviations: 2 = Random allocation, 3 = Concealed allocation, 4 = Baseline comparability, 5 = Blind subjects, 6 = Blind therapists, 7 = Blind assessors = 8. Adequate follow-up, 9 = Intention-to-treat analysis, 10 = Between-group comparisons, 11 = Point estimates and variability.

**Supplementary Table S2. Newcastle-Ottawa Assessment Scores.**

| Authorship                     | Selection |    |    |    | Comparability<br>C1 | Exposure |    |    | Total Score |
|--------------------------------|-----------|----|----|----|---------------------|----------|----|----|-------------|
|                                | S1        | S2 | S3 | S4 |                     | E1       | E2 | E3 |             |
| Fortún et al., 2022            | *         | *  |    |    |                     | *        |    |    | ***         |
| Razaghi et al. 2021            | *         |    |    |    |                     | *        |    |    | **          |
| Fernández-Cuadros et al., 2020 | *         | *  |    |    |                     | *        |    |    | ***         |
| Dayan et al., 2019             | *         | *  |    |    |                     | *        |    |    | ***         |
| Sodre et al., 2019             | *         | *  |    |    |                     | *        |    |    | ***         |
| Wilson et al., 2018            |           |    |    |    |                     | *        |    |    | *           |
| Caruth et al., 2018            |           |    |    |    |                     | *        |    |    | *           |
| Lordelo et al., 2017           | *         | *  |    |    |                     | *        |    |    | ***         |
| Vicariotto et al., 2016        |           |    |    |    |                     | *        |    |    | *           |
| Alinsod et al., 2016           |           |    |    |    |                     |          |    |    | -           |

Abbreviations: S1 = Adequate case definition; S2 = Representativeness of the cases; S3 = Selection of controls; S4 = Definition of controls; C1 = Comparability of cases and controls; E1 = Ascertainment of Exposure; E2 = Same method of ascertainment for cases and controls; E3 = Non-Response rate; \*: number of stars obtained in NOS.
